# Supplementary material
Source: publisher figshare collection journal article supplement (https://gsajournals.figshare.com/ndownloader/files/24788240)
Supplement: Supplementary file 1 [file 24788240]

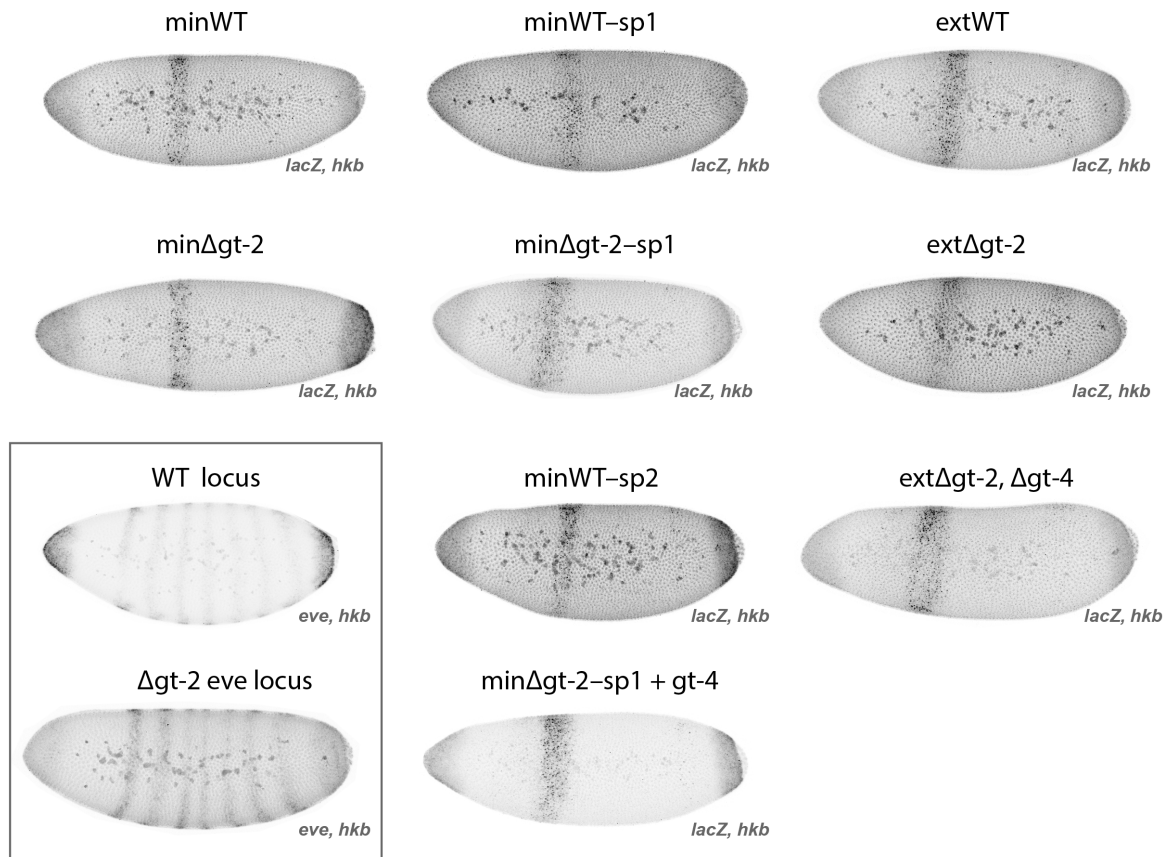

**Figure S2: Representative images of embryos used in this study.** The unboxed embryos harbor each of the reporter constructs and were stained for *lacZ* and a normalization gene, *hkb*. The boxed embryos represent embryos stained for *eve* expression in the *eve*[*eveS2Δgt-2*] or control genotype. Note that *eve* expression was normalized to the levels of stripe 1, so the *hkb* costain data was not used. The images are maximum intensity projections of embryos aged at 9% membrane invagination.
